# Supplementary material for: Analysis and application of volatile metabolic profiles of Escherichia coli : a preliminary GC-IMS-based study
Source: Royal Society of Chemistry journal article supplement (doi:10.1039/d4ra03601h), 2024-01-01
Supplement: d4ra03601h1.xlsx [file d4ra03601h1.xlsx]

## Sheet: Sheet1
Supplementary Table 1 VOCs relative content in different groups at T0-T4 time points detected by GC-IMS
Label	Blank control (mean±SD)					CSEC (mean±SD)					CREC (mean±SD)
	T0(n=6)	T1(n=6)	T2(n=6)	T3(n=6)	T4(n=6)	T0(n=6)	T1(n=6)	T2(n=6)	T3(n=6)	T4(n=6)	T0(n=6)	T1(n=6)	T2(n=6)	T3(n=6)	T4(n=6)
Ethylene glycol	162.72±61.64	111.88±32.51	103.43±27.69	88.67±24.35	85.81±13.33	55.08±7.14	55.77±8.24	54.9±6.53	45.82±4.04	59.08±10.94	54.53±5.43	52.67±11.48	57.44±10.7	49.66±4.75	58.2±11.14
1-Butanol	1865.4±252.06	1810.2±65.14	1788.99±148.28	1791.91±58.45	1738±69.58	1761.59±186.41	1649.86±162.97	1635.3±98.62	1628.15±88.55	1607.13±75.76	1360.78±416.78	1581.48±156.77	1564.05±142.13	1553.29±124.15	1516.26±132.15
3-Methyl-1-butanol-D	77.15±34.17	86.22±30.56	118.3±44.27	290.97±231.1	473.34±409.72	973.29±80.34	1112.05±104.47	1217.46±74.75	1317.69±69	1380.62±69.99	852.6±122.39	1003.14±88.85	1165.41±74.34	1285.28±84.69	1351.86±83.49
3-Methyl-1-butanol-M	165.52±53.64	180.76±47.84	242.46±110.28	377.44±243.41	415.75±240.21	841.11±56.86	685.48±49.11	645.59±17.37	658.62±18.64	640.15±31.24	829.68±30.77	644.01±51.03	599.69±35.08	602.59±25.51	591.46±31.99
Acetaldehyde	274.58±71.42	275.01±86.63	270.24±98.29	280.72±72.19	302.4±89.04	340.32±22.75	323.08±32.71	307.96±14.9	292.53±17.87	310.27±33.7	341.42±18.33	314.62±48.32	268.48±13.16	272.26±17.86	295.31±22.56
Propanal	86.15±37.59	72.47±44.08	79.5±44.99	84.52±36.37	72.44±37.35	130.71±6.97	144.16±9.56	149.66±6.51	141.52±7.61	134.83±6.97	128.35±12.1	140.9±10.43	146.02±8.31	137.65±6.75	136.45±5.46
Nonanal	232.57±174.73	239.46±124.51	246.83±164.08	235.89±163.84	205.4±154.78	74.89±29.84	51.01±10.54	56.93±17.85	38.29±8.44	38.17±10.67	77.26±17.53	47.15±4.21	43.85±12.96	31.75±7.9	35.17±13.76
Benzaldehyde-D	144.43±32.25	210.65±45.27	211.35±83.33	203.83±110.15	209.37±137.94	101.42±28.04	85.75±20.11	86.75±18.02	92.32±15.83	103.22±19.07	157.05±27.45	107±8.25	109±9.54	113.85±10.81	122.59±13.41
Benzaldehyde-M	500.5±68.52	535.99±64.7	490.92±104.53	422.56±174.71	445.98±165.24	354.96±32.5	306.03±30.42	355.55±23.81	407.94±48.07	398.21±30.29	344.65±71.77	343.85±37.03	434.55±28.2	434.22±33.8	462.6±32.47
3-Methyl-2-butenal	214.55±42.22	210.21±51.19	197.67±30.95	162.55±26.82	128.81±56.11	66.97±12.23	45.64±6.57	42.45±3.32	43.64±5.83	46.91±3.1	77.83±18.43	52.31±8.7	51.13±4.46	51.42±1.9	58.81±3.33
Acetic acid	2273.72±544.4	1840.73±536.2	2472.66±684.54	2695.42±743.98	3700.35±1377.39	3471.6±505.61	4435.88±269.26	4870.41±227.01	5230.03±358.25	5324.49±391.57	3815.33±394.17	4875.58±156.06	5542.03±211.99	5667.39±211.92	5739.94±285.06
Propionic acid-D	300.03±67.85	487.68±101.08	506.04±107.29	601.22±149.92	721.27±122.7	622.1±179.09	797.77±199.93	969.72±157.46	836.08±153.42	1297.84±366.95	695.55±76.79	821.61±216.74	1111.54±159.08	965.44±106.83	1073.35±165.06
Propionic acid-M	523.93±163	908.51±204.62	872.58±74.15	982.46±169.35	1037.45±288.49	1806.14±412.87	1874.66±224.51	1859.16±114.56	1602.5±197.88	1915.3±239	1941.64±156.89	1752.92±292.85	1898.72±129.03	1723.43±124.17	1741.79±121.97
Ethyl acrylate	629.69±572.39	523.03±448.83	500.39±429.04	453.83±370.58	373.34±265.12	287.42±44.35	200.73±52.33	176.7±56.63	182.89±60.28	190.72±74.72	254.71±111	200.57±84.82	181.89±82.18	187.51±81.76	186.99±81.67
Bornyl acetate	92.72±14.17	114.31±12.79	123.23±20.25	163.28±34.61	260.97±148.94	284.63±65.95	518.65±50.77	672.35±43.01	643.25±71.67	768.75±127.96	331.53±56.22	558.28±78.84	804.68±44.9	762.87±27.26	813.62±91.17
Methyl 2-methylbutanoate	1240.01±678.15	1051.97±438.14	1111.6±461.52	992.36±409.85	1015.14±420.43	882.66±97.41	843.39±55.21	857.25±32.21	847.05±40.6	888.41±35.15	817.6±76.72	910.8±127.72	966.58±105.78	967.38±89.69	1030.13±85.48
Acetone	8608.2±1551.78	8158.51±1249.69	8141.33±1285.66	8314.74±1082.69	8427.81±1027.11	8798.32±910.02	8802.83±879.64	8802.85±819.94	8722.19±754.23	8677.81±712.84	8783.86±947.38	8781.36±793.53	8819.36±808.17	8711.82±759.12	8669.16±680.14
Butan-2-one	1185.97±332.68	1224.88±384.76	1229.63±362.22	1220.49±338.46	1203.05±346.07	1259.73±432.11	1245.87±386.13	1314.57±308.1	1380.29±291.54	1430.36±293.74	1208.37±457.73	1305.2±396.35	1405.76±309.14	1478.44±255.75	1537.53±267.92
Cyclohexanone	118.52±31.78	162.23±43.22	142.87±25.34	131.68±21.36	110.55±25.94	134.96±18.2	196.67±43.91	184.76±13.13	192.52±8.87	213.58±38.63	144.11±18.39	216.13±96.12	180.47±14.04	184.72±14.12	181.16±11.05
2,3-Pentanedione	36.44±15.45	28.18±6.02	29.69±9.32	28.63±8.78	24.47±4.73	18.59±2.2	18.2±1.54	17.14±2.96	17.62±2.7	18.79±3.45	17.03±1.86	16.02±2.91	15.43±1.92	17.88±1.67	18.12±3.32
3-Hydroxybutan-2-one (acetoin)	745.72±186.79	523.02±70.01	627.43±116.83	846.6±102.53	903.86±121.96	384.81±102.53	359.24±32.25	437.08±53.95	466.7±42.35	400.89±47.81	341.93±18.73	323.77±52.85	388.02±19.13	411±19.21	382.09±45.99
2-Methylpyrazine	98.64±17.29	96.89±31.58	135.16±31.02	199.13±91.46	184.12±66.85	103.09±28.14	103.28±9.74	102.81±8.98	103.46±9.59	103.5±11.09	95.72±5.32	106.71±5.68	109.87±8.33	113.35±6.53	113.14±6.3
2-Ethyl-5-methylpyrazine	70.31±16.21	74.89±8.86	65.48±9.58	63.56±15.05	70.75±14.94	69.58±10.56	67.33±19.54	79.82±12.44	88.05±10.57	84.87±12.85	77.6±10.99	76.43±20.4	91.22±10.14	94.34±8.45	80.85±11.9
2,5-Dimethylpyrazine	392.98±112.12	457.53±137.07	478±142.65	461.8±163.45	440.73±177.47	327.62±97.55	368.77±85.3	398.75±91.67	404.48±96.5	417.94±103.06	364.01±103.53	400.62±75.61	434.23±75.49	430.17±74.81	435.24±70.87
Pyrrolidine-D	808.53±245.14	776.83±279.71	758.08±266.7	745.08±289.08	810.56±387.75	708.11±161.38	674.42±155.52	677.02±111.7	689.51±92.7	714.25±71.6	687.97±76.01	697.59±54.06	679.6±55.53	700.92±54.09	738.9±79.51
Pyrrolidine-M	570.02±185.93	615.49±160.82	611.36±160.38	636.41±158.51	643.29±109.02	601.98±53.2	677.61±49.46	733.06±32.91	725.51±28.41	668.21±59.72	560.55±99.18	608.37±84.24	653.09±79.44	641.12±80.73	596.2±77.76
Unidentified-1	247.92±34.99	273.56±102.18	262.51±113.53	298.19±93.51	382.29±163.52	136.73±45.09	179.63±56.99	246±55.43	261.37±50.44	236.28±46.8	129.71±48.72	187.48±34.62	249.74±35.17	278.54±48.9	273.05±61.13
Unidentified-2	835.88±657.88	791.95±604.71	746.99±563.7	722.13±550.02	639.33±474.62	505.04±169.94	428.13±136.28	380.89±111.58	356.24±93.23	339.61±93.76	398.76±154.33	318.79±74.16	319.54±70.47	310.41±61.11	298.74±58.38
Unidentified-3	3167.5±140.04	2959.04±233.17	2733.67±168.25	2706.42±254.27	2723.07±216.47	1104.54±389.21	1009.05±256.96	997.4±163.68	985.22±133.47	935.26±123.33	636.59±411.39	985.04±372.91	927.8±236.18	912.6±234.95	847.89±203.64
Unidentified-4	406.58±50.52	398.22±29.79	377.29±36.87	376.45±33.61	379.97±18.01	380.91±56.95	354.72±54.05	343.66±29.79	337.36±24.7	321.29±24.31	296±110.07	347.33±26.06	333.54±21.81	329.48±26.98	307.4±17.55
Unidentified-5	11318.83±2182.59	9917.21±1955.51	10264.39±1673.03	10041.17±1774.86	10799.82±1257.51	10574.13±1950.79	11487.66±2170.91	11787.63±1969.04	11775.99±1824.36	11462.2±1933.13	9749.65±3060.46	11338.99±2173.06	11688.03±2093.5	11652.77±2000.42	11540.5±1944.59
Unidentified-6	50.5±8.12	61.67±9.26	63.99±10.7	66.95±10.08	76.86±17.1	48.81±5.49	58.32±4.29	59.12±2.69	60.7±4.27	60.37±4.57	53.53±6.61	63.11±3.9	62.32±2.93	61.78±4.27	62.53±3
Unidentified-7	34.23±8.03	30.84±11.56	27.53±6.43	27.87±8.88	32.54±10.64	28.23±2.98	25.69±6.18	30.71±5.96	31.88±12.82	46.03±33.4	25.01±2.36	25.58±4.55	25.84±4.79	25.56±2.66	25.04±2.81
Unidentified-8	2217.03±534.05	2318.75±441.96	2402.09±393.13	2615.74±358.71	3496.43±670.63	3341.82±428.53	5384.09±272.28	6006.3±104.43	6071.24±134.76	6076.47±185.38	3473.81±617.54	5603.47±148.5	6157.6±125.46	6256±117.86	6344.6±149.48
Unidentified-9	181.2±40.05	181.34±30.3	183.46±15.34	200.12±10.26	359.44±149.01	236.65±61.64	665.13±97.65	962.88±80.62	1028.63±35.46	1067.38±47.44	282.11±77.81	780.19±33.32	1048.66±53.25	1107.73±36.61	1131.09±47.83
Unidentified-10	129.05±23.58	132.08±22.42	139.94±32.98	177.02±64.23	264.71±144.45	378.24±41.33	616.45±35.22	741.83±15.61	776.67±21.17	782.67±19.57	359.29±64.52	640.6±40.3	787.02±10.04	821.73±14.81	844.96±22.45
Abbreviations: VOCs, volatile organic compounds; GC-IMS, gas chromatography-ion mobility spectrometry; SD, standard deviation; M, monomer; D, dimer; CSEC,Carbapenem sensitive Escherichia coli; CREC,Carbapenem resistant Escherichia coli.
