# Supplementary material for: Analysis and application of volatile metabolic profiles of Escherichia coli : a preliminary GC-IMS-based study
Source: Royal Society of Chemistry journal article supplement (doi:10.1039/d4ra03601h), 2024-01-01
Supplement: d4ra03601h2.xlsx [file d4ra03601h2.xlsx]

## Sheet: Sheet1
Supplementary Table 2 The relative VOCs content at T0-T4 time points after IPM was added in different groups detected by GC-IMS
Label	Blank control+IPM (mean±SD)					CSEC+IPM (mean±SD)					CREC+IPM (mean±SD)
	T0(n=6)	T1(n=6)	T2(n=6)	T3(n=6)	T4(n=6)	T0(n=6)	T1(n=6)	T2(n=6)	T3(n=6)	T4(n=6)	T0(n=6)	T1(n=6)	T2(n=6)	T3(n=6)	T4(n=6)
Ethylene glycol	109.73±39.96	105.9±32.61	99.39±28.48	85.84±23.81	85.6±19.49	58.13±10.18	52.37±5.2	55.41±13.8	48.34±7.35	52.06±6.78	51.59±7.6	51.65±6.14	51.78±5.88	49.15±7.4	53.14±7.55
1-Butanol	1806.89±207.03	1774.62±81.28	1728.77±87.01	1644.36±78.46	1685.06±64.51	1234.11±182.31	1288.24±123.28	920.52±30.03	1106.96±126.18	1265.5±108.05	1663.12±99.5	1579.22±120.1	1454.23±153.1	1508.99±99.62	1476.03±95.57
3-Methyl-1-butanol-D	73.3±36.63	73.87±31.74	72.25±36.83	77.88±31.92	81.03±26.83	787.6±70.87	713.99±77.93	777.74±40.38	740.68±66.53	746.36±85.46	824.87±117.76	960.3±106.1	1129.12±74.04	1120.03±185.47	1164.93±215.64
3-Methyl-1-butanol-M	144.05±38.2	146.31±33.58	150.41±27.84	152.86±28.79	166.85±34.15	846.89±59.31	788.77±60.97	623.48±44.51	800.65±17.45	784.4±46.87	799.43±28.45	713.5±32.96	613.43±30.71	634.93±77.8	630.45±73.54
Acetaldehyde	265.46±104.79	281.07±100.04	296.59±110.64	278.96±138.15	351.24±89.87	335.41±20.17	318.94±18.58	294.95±22.59	345.11±10.19	355.04±9.81	345.93±18.78	296.72±27.65	268.4±12.58	279.04±35.47	296.3±40.46
Propanal	63.92±41.68	73.6±46.19	80.47±49.8	71.85±56.76	86.58±53.34	113.77±5.46	115.14±3.85	118.63±5.93	124.4±2.84	126.48±3.13	125.74±12.5	133.48±10.82	141.43±8.3	137.3±12.28	133.96±9.12
Nonanal	240.75±93.2	232.84±88.44	252.08±132.52	264.55±143.21	238.97±118.98	210.47±17.91	212.75±10.93	218.85±67.62	193.07±10.2	190.95±41.29	73±5.72	74.91±16.05	37.12±3.36	47.51±27.34	43.11±27.51
Benzaldehyde-D	213.48±44.59	265.57±59.61	293.9±75.78	303.37±70.23	324.33±76.44	137.39±36.51	164.51±36.23	154.56±29.98	174.69±36.21	185.7±72.41	168.86±17.93	166.01±42.11	110.22±10.22	198.63±121.13	223.83±153.28
Benzaldehyde-M	563.28±87.48	627.14±60.07	639.17±75.96	609.8±76.52	619.24±56.45	376.45±47.42	429.38±36.18	454.76±33.25	508.2±49.59	529.97±51.86	392.96±37.27	423.38±71.16	421.76±33.27	486.32±75.84	514.03±72.08
3-Methyl-2-butenal	211.14±46.67	211.28±45.11	220.02±48.34	191.22±35.77	199.71±34.77	65.96±8.98	43.11±5.21	41.79±2.6	41.54±5.67	40.72±3.09	72.27±14.64	55.86±9.38	48.3±5.38	53.9±7.11	57.01±4.44
Acetic acid	1844.99±517.35	1416.31±380.73	1759.6±504.83	1932.13±540.8	2677.4±1031.98	3291.99±498.82	3531.58±153.17	3793.23±671.73	3648.2±530	3650.92±467.17	3477.95±436.98	4871.46±172.34	5684.85±153.49	5476.55±389.12	5619.67±409.03
Propionic acid-D	360.67±110.54	471.13±129.15	536.87±158.91	565.95±170.27	625.22±192.21	637.76±197.84	649.93±118.54	585.02±122.89	619.46±208.94	613.41±170.88	713.06±158.98	839.18±142.55	1021.79±149.56	931.12±126.74	1035.42±141.55
Propionic acid-M	494.39±138.06	713.53±138.93	653.79±50.79	751.17±95.45	784.28±166.08	1915.47±319.23	1927.38±242.15	2042.85±201.79	2037.51±254.67	2094.6±279.96	1930.33±275.35	1856.93±292.81	1810.84±173.07	1709.94±250.25	1775.36±173
Ethyl acrylate	582.06±508.6	531.32±477.37	475.93±398.29	476.69±406.81	451.09±379.41	681.59±59.46	653.48±52.53	617.25±97.71	662.78±59.81	666.2±67.53	243.36±91.35	217.09±93.17	201.43±69.79	200.17±90.72	202.28±88.02
Bornyl acetate	77.37±7.94	103.2±15.23	105.69±15.46	122.32±19.33	136.52±29.8	379.11±82.75	374.52±12.68	376.96±100.43	414.11±110.21	420.77±97.83	324.18±57.67	504.43±75.3	765.26±35.41	672.36±125.54	730.07±147.31
Methyl 2-methylbutanoate	1217.32±558.56	1084.7±484.75	1077.25±407.27	1101.8±512.97	975.29±402.17	1168.71±70.44	1114.14±61.55	1171.33±29.97	1189.99±52.87	1289.09±46.41	816.46±58.96	876.86±62.88	895.05±41.47	904.92±50.31	921.68±45.81
Acetone	8168.74±1458.29	8199.09±1281.3	8274.71±1192.7	8024.87±1420.41	8395.31±1042.52	8755.64±892.2	8797.86±874.05	8606.86±191.36	8831.57±793.63	8848.15±766.48	8801.36±910.38	8895.32±889.74	8694.1±815.66	8900.35±818.94	8853.98±737.69
Butan-2-one	1219.18±357.74	1231.62±364.33	1271.09±356.54	1202.55±311.76	1294.15±373.94	2254.15±405.29	2215.48±410.17	2015.94±71.14	2247.31±386.12	2275.02±383.35	1192.43±471.69	1240.21±438.13	1365.89±312.65	1310.28±324.6	1354.34±300.13
Cyclohexanone	152.68±28.09	171.03±24.22	176.06±30.43	168.2±17.74	158.78±16.79	429.34±8.81	441.47±6.44	451.97±39.32	447.25±5.98	472.54±13.14	142.01±24.29	151.93±14.62	169.56±7.13	168.75±9.53	177.31±17.17
2,3-Pentanedione	35.74±10.41	27.9±7.43	28.43±7.01	32.19±19.97	23.5±4.69	35.88±3.04	37.72±1.97	32.88±4.13	36.64±1.39	35.86±1.87	16.1±1.85	16.9±2.49	17.45±2.33	18.22±3.34	17.7±2.48
3-Hydroxybutan-2-one (acetoin)	699.28±89.28	614.9±14.68	644.14±67.84	741.19±69.51	833.5±159.02	240.8±47.88	231.86±20.15	265.9±33.7	203.42±22.12	194.82±34.95	320.37±31.05	328.73±3.94	424.49±52.26	416.71±29	400.12±20.72
2-Methylpyrazine	89.2±22.53	96.64±33.13	117.35±30.08	127.25±32.34	185.8±96.19	94.34±9.38	92.63±9.53	96.86±4.47	94.78±10.29	95.97±10.66	96.73±9.79	105.77±6.05	103.87±9.67	111.59±3.68	110.89±2.24
2-Ethyl-5-methylpyrazine	60.65±13.28	69.21±11.16	68.58±12.69	63.43±12.81	64.22±6.41	22.9±12.77	15.31±10.6	17.09±2.76	23.34±5.3	27.81±11.44	70.38±8.74	85.95±7.8	89.56±8.96	83.54±11.22	82.69±11.29
2,5-Dimethylpyrazine	413.54±120.34	457.9±146.85	467.42±139.3	486.32±136.61	463.13±152.16	437.64±109.71	442.5±95.3	416.51±14.22	454.11±92.13	450.3±100.07	349.01±87.57	369.43±91.14	388.67±74.77	407.87±80.52	404.6±76.7
Pyrrolidine-D	816.14±269.37	796.82±300.27	767.94±262.36	767.65±279.01	746.93±294.01	803.73±142.71	803.22±139.07	815.98±67.87	822.71±104.68	835.05±92.85	680.97±67.59	693.18±76.75	627.43±38.91	677.72±76.65	690.56±69.94
Pyrrolidine-M	566.61±165.99	612.49±151.41	601.32±147.07	612.79±142.73	639.71±132.29	402.44±45.92	417.98±45.57	399.24±34.69	422.6±49.76	422.55±48.17	548.72±70.3	608.75±90.38	716.74±17.06	646.61±121	632.89±108.99
Unidentified-1	266.53±90.3	296.01±107.98	285.61±129.88	265.44±79.13	327.63±118.8	89.49±2.32	94.84±4.59	83.26±5.19	82.7±9.43	93.35±5.31	136.52±44.37	163.84±39.54	279.77±53.22	261.63±83.48	260.19±83.44
Unidentified-2	771.77±609.27	692.69±540.49	613.33±471.68	543.72±376.82	522.22±416.57	334.25±176.88	335.59±152	314.23±9.68	353.31±124.16	318±98.59	352.27±120.87	299.8±86.48	259.75±65.36	287.09±58.54	267.76±49.61
Unidentified-3	3035.53±159.93	2930.45±223.5	2735.49±157.07	2714.1±227	2706.81±250.47	154.2±21.6	146.16±16.47	189.92±20.9	157.81±16.81	160.34±17.11	999.77±163.39	960.1±212.46	776.88±256.79	873.47±170.64	843.92±170.94
Unidentified-4	391.79±36.14	398.69±28.66	395.31±27.74	379.28±28.11	410.89±23.69	279.73±49.7	284.05±25.21	240.1±12.68	279.25±25.35	277.2±23.23	373.01±14.56	376.25±22.72	332.8±45.25	357.63±19.01	348.1±21.73
Unidentified-5	10773.21±1513.96	9984.09±1831.83	9980.83±1711.85	10128.98±1944.65	9587.14±1968.51	7569.48±124.84	7688.99±286.16	7499.96±398.37	7591.48±179.73	8190.46±748.52	9914.21±2878.82	10725.53±2810.22	11070.2±2100.91	11327.42±2496.78	11285.43±2389.78
Unidentified-6	142.61±107.19	264.78±148.75	375.13±143.59	411.72±149.13	497.49±78.22	85.73±36.78	179.33±82.64	202.3±59.05	302.62±90.71	371.04±77.75	224.51±122.79	288.73±108.38	235.09±77.39	280.05±54.74	329.9±59.04
Unidentified-7	80.2±98.51	178.98±219.05	331.07±322.77	445.35±445.67	716.72±516.65	42.46±19.13	117.3±81.31	324.65±183.03	320.24±189.87	485.35±231.81	178.34±150.78	330.7±257.62	223.87±127.4	284.38±102.08	422.69±132.69
Unidentified-8	2260.13±455.95	2255.47±475.08	2306.77±394.85	2285.08±435.51	2393.91±397.45	2265.36±462.96	2914.23±389.69	2493.5±302.12	2995.87±299.96	2980.14±333.14	3411.21±405.6	4534.83±380.81	5863.61±274.64	5434.89±911.9	5414.98±904.72
Unidentified-9	201.36±21.91	200.7±35.71	186.82±24.13	186.27±30.34	190.7±30.1	271.07±44.61	376.77±47.13	392.07±20.7	420.38±42.05	432.8±57.25	309.21±76.64	561.32±103.74	977.77±97.87	940.96±347.13	962.69±378.03
Unidentified-10	125.6±28.14	128.03±17.65	126.73±20.56	130.37±20.48	136.94±22.35	372.3±35.13	430.03±36.64	381.58±30.86	454.41±36.85	459.56±50.66	365.88±43.22	516.61±51.09	730.34±32.3	703.59±174.95	720.88±173.89
Abbreviations: VOCs, volatile organic compounds; IPM,Imipenem; GC-IMS, gas chromatography-ion mobility spectrometry; SD, standard deviation; M, monomer; D, dimer; CSEC,Carbapenem sensitive Escherichia coli; CREC,Carbapenem resistant Escherichia coli.
